# Supplementary material for: A Novel Defined Ferroptosis-Related Gene Signature for Predicting the Prognosis of Kidney Renal Clear Cell Carcinoma
Source: Research Square preprint supplement (doi:10.21203/rs.3.rs-882590/v1), 2021-09-17
Supplement: Supplementary file 1 [file 85cde7e55520f62c8b8dcfb1.xlsx]

## Sheet: Supplementary Table 1
Symbol	Name	HGNC_ID	Evidence	Test method	Test in	Test setting	Pathway	Confidence
RPL8	Ribosomal protein L8	HGNC:10368	Required in erastin-induced ferroptosis. Silencing of it conferred against erastin-induced ferroptosis.	shRNA screening, qPCR, gene silencing	Human	NRAS mutant HT-1080 fibrosarcoma cells; KRAS mutant Calu-1 non small cell lung cancer cell	RPL8 :+: Ferroptosis	Validated
IREB2	Iron response element binding protein 2	HGNC:6115	Required in erastin-induced ferroptosis. Silencing of it conferred against erastin-induced ferroptosis.	shRNA screening, qPCR, gene silencing	Human	NRAS mutant HT-1080 fibrosarcoma cells; KRAS mutant Calu-1 non small cell lung cancer cell	RPL8 :+: Ferroptosis	Validated
ATP5MC3	ATP synthase membrane subunit c locus 3	HGNC:843	Required in erastin-induced ferroptosis. Silencing of it conferred against erastin-induced ferroptosis.	shRNA screening, qPCR, gene silencing	Human	NRAS mutant HT-1080 fibrosarcoma cells; KRAS mutant Calu-1 non small cell lung cancer cell	RPL8 :+: Ferroptosis	Validated
CS	Citrate synthase	HGNC:2422	Required in erastin-induced ferroptosis. Silencing of it conferred against erastin-induced ferroptosis.	shRNA screening, qPCR, gene silencing	Human	NRAS mutant HT-1080 fibrosarcoma cells; KRAS mutant Calu-1 non small cell lung cancer cell	RPL8 :+: Ferroptosis	Validated
EMC2	ER membrane protein complex subunit 2	HGNC:28963	Required in erastin-induced ferroptosis. Silencing of it conferred against erastin-induced ferroptosis.	shRNA screening, qPCR, gene silencing	Human	NRAS mutant HT-1080 fibrosarcoma cells; KRAS mutant Calu-1 non small cell lung cancer cell	RPL8 :+: Ferroptosis	Validated
ACSF2	Acyl-CoA synthetase family member 2	HGNC:26101	Required in erastin-induced ferroptosis. Silencing of it conferred against erastin-induced ferroptosis.	shRNA screening, qPCR, gene silencing	Human	NRAS mutant HT-1080 fibrosarcoma cells; KRAS mutant Calu-1 non small cell lung cancer cell	RPL8 :+: Ferroptosis	Validated
G6PD	Glucose-6-phosphate dehydrogenase	HGNC:4057	Required in erastin-induced ferroptosis.	shRNA silencing, RT-qPCR	Human	NRAS mutant HT-1080 fibrosarcoma cells; KRAS mutant Calu-1 non small cell lung cancer cell	RPL8 :+: Ferroptosis	Validated
PGD	Phosphoglycerate dehydrogenase	HGNC:8891	Required in erastin-induced ferroptosis.	shRNA silencing, RT-qPCR	Human	NRAS mutant HT-1080 fibrosarcoma cells; KRAS mutant Calu-1 non small cell lung cancer cell	RPL8 :+: Ferroptosis	Validated
VDAC2	Valtage-dependent anion channels 2	HGNC:12672	Required in erastin-induced ferroptosis.	shRNA silencing, RT-qPCR	Human	NRAS mutant HT-1080 fibrosarcoma cells; KRAS mutant Calu-1 non small cell lung cancer cell	RPL8 :+: Ferroptosis	Validated
PIK3CA	Phosphatidylinositol-4,5-bisphosphate 3-kinase catalytic subunit alpha	HGNC:8975	Inhibitor blocked ferroptotic cell death.	Cell survival assays	Mice	HT22 cells	PIK3CA :-: GSH, GSH :-: Lipid ROS, Lipid ROS :+: Ferroptosis	Validated
FLT3	Fms related tyrosine kinase 3	HGNC:3765	Inhibitor blocked ferroptotic cell death.	Cell survival assays	Mice	HT22 cells	PIK3CA :-: GSH, GSH :-: Lipid ROS, Lipid ROS :+: Ferroptosis	Validated
SCP2	Sterol carrier protein 2	HGNC:10606	SCP-2 inhibitors showed anti-ferroptotic activity, which was substantiated by knocking down SCP-2 in Gpx4−/− cells.	Cell viability test, siRNA-mediated knockdown.	Mice	HT22 cells	PIK3CA :-: GSH, GSH :-: Lipid ROS, Lipid ROS :+: Ferroptosis	Validated
TP53	Tumor protein p53	HGNC:11998	Inhibits cystine uptake and sensitizes cells to ferroptosis. Erastin induced high levels of cell death in p53+/+ MEFs.	Cell death kinetics, shRNA, western blotting, RT-PCR, ChIP assay, cystine uptake assay	Human, mice	H1299, U2OS and MCF7 cells, mouse embryonic fibroblasts	TP53 :-: SLC7A11, SLC7A11 :+: Cystine, Cystine :-: Ferroptosis	Validated
ACSL4	Acyl-CoA synthetase long chain family member 4	HGNC:3571	Deletion of this gene likely suppress ferroptosis by limiting the membrane-resident pool of oxidation-sensitive fatty acids.	Retroviral-mediated insertional mutagenesis and sequencing	Human	NRAS mutant HT-1080 fibrosarcoma cells; KRAS mutant Calu-1 non small cell lung cancer cell	RPL8 :+: Ferroptosis	Validated
LPCAT3	Lysophosphatidylcholine acyltransferase 3	HGNC:30244	Deletion of this gene likely suppress ferroptosis by limiting the membrane-resident pool of oxidation-sensitive fatty acids.	Retroviral-mediated insertional mutagenesis and sequencing	Human	NRAS mutant HT-1080 fibrosarcoma cells; KRAS mutant Calu-1 non small cell lung cancer cell	RPL8 :+: Ferroptosis	Validated
TF	Transferrin	HGNC:11740	Essential for the induction of ferroptotic cell death. Transferrin can only interact with transferrin receptor and be transported into the cell when it is loaded with iron.	Killing activity	Mice	HT22 cells	PIK3CA :-: GSH, GSH :-: Lipid ROS, Lipid ROS :+: Ferroptosis	Validated
TFRC	Transferrin receptor	HGNC:11763	RNAi of transferrin receptor (TfR) inhibited ferroptosis.	RNAi	Mice	HT22 cells	PIK3CA :-: GSH, GSH :-: Lipid ROS, Lipid ROS :+: Ferroptosis	Validated
TFR2	Transferrin receptor 2	HGNC:11762	RNAi of transferrin receptor (TfR) inhibited ferroptosis.	RNAi	Mice	HT22 cells	PIK3CA :-: GSH, GSH :-: Lipid ROS, Lipid ROS :+: Ferroptosis	Validated
SLC38A1	Solute carrier family 38 member 1	HGNC:13447	RNAi knockdown markedly blocked ferroptosis.	RNAi knockdown, cell survival analysis	Mice	HT22 cells	PIK3CA :-: GSH, GSH :-: Lipid ROS, Lipid ROS :+: Ferroptosis	Validated
SLC1A5	Solute carrier family 1 member 5	HGNC:10943	Pharmacological inhibition by L-g-glutamyl-p-nitroanilide or RNAi knockdown markedly blocked ferroptosis.	RNAi knockdown, cell survival analysis	Mice	HT22 cells	PIK3CA :-: GSH, GSH :-: Lipid ROS, Lipid ROS :+: Ferroptosis	Validated
GLS2	Glutaminase 2	HGNC:29570	Both inhibitor inhibition and gene knockdown inhibit ferroptotic cell death.	shRNA, western blot, cell viability	Mice	HT22 cells	PIK3CA :-: GSH, GSH :-: Lipid ROS, Lipid ROS :+: Ferroptosis	Validated
GOT1	Glutamic-oxaloacetic transaminase 1	HGNC:4432	RNAi reduced ferroptosis.	shRNA, qPCR, cell viability	Mice	HT22 cells	PIK3CA :-: GSH, GSH :-: Lipid ROS, Lipid ROS :+: Ferroptosis	Validated
CARS1	Cysteinyl-tRNA synthetase 1	HGNC:1493	Required for ferroptosis in diverse cell contexts. Knockdown of CARS inhibited erastin-induced death by preventing the induction of lipid reactive oxygen species, without altering iron homeostasis.	siRNA screen, shRNA, western blot, cell viability	Human, rat	HT-1080 fibrosarcoma cells,BJeLR fibroblast cells, Panc1 cells, A673 (Ewing’s sarcoma) and 143B (osteosarcoma) cells, PC12 cells	CARS1 :-: Transsulfuration pathway, Transsulfuration pathway :-: Ferroptosis	Validated
ALOX5	Arachidonate 5-lipoxygenase	HGNC:435	The 5-Lipoxygenase inhibitor zileuton protected HT22 neuronal cells from erastin-induced ferroptosis.	Cell Viability Assay, ROS measurement	Mice	HT22 cells	PIK3CA :-: GSH, GSH :-: Lipid ROS, Lipid ROS :+: Ferroptosis	Validated
KEAP1	Kelch like ECH associated protein 1	HGNC:23177	Zinc protoporphyrin IX, a HO-1 inhibitor, prevented Erastin-triggered ferroptotic cancer cell death. Overexpression accelerates erastin-induced cell death.	Cell viability assay, qRT-PCR, western blot	Human, mice	H1299, U2OS and MCF7 cells, mouse embryonic fibroblasts	TP53 :-: SLC7A11, SLC7A11 :+: Cystine, Cystine :-: Ferroptosis	Validated
HMOX1	Heme oxygenase 1	HGNC:5013	Zinc protoporphyrin IX, a HO-1 inhibitor, prevented Erastin-triggered ferroptotic cancer cell death. Overexpression accelerates erastin-induced cell death.	Cell viability assay, qRT-PCR, western blot	Human, mice	H1299, U2OS and MCF7 cells, mouse embryonic fibroblasts	TP53 :-: SLC7A11, SLC7A11 :+: Cystine, Cystine :-: Ferroptosis	Validated
ATG5	Autophagy related 5	HGNC:589	Knockout or knockdown limited erastin-induced ferroptosis.	shRNA	Human, mice	H1299, U2OS and MCF7 cells, mouse embryonic fibroblasts	TP53 :-: SLC7A11, SLC7A11 :+: Cystine, Cystine :-: Ferroptosis	Validated
ATG7	Autophagy related 7	HGNC:16935	Knockout or knockdown limited erastin-induced ferroptosis.	shRNA	Human, mice	H1299, U2OS and MCF7 cells, mouse embryonic fibroblasts	TP53 :-: SLC7A11, SLC7A11 :+: Cystine, Cystine :-: Ferroptosis	Validated
NCOA4	Nuclear receptor coactivator 4	HGNC:7671	Inhibition suppressed ferroptosis, and overexpression promoted ferroptosis.	shRNA, gene transfection	Human	NRAS mutant HT-1080 fibrosarcoma cells; KRAS mutant Calu-1 non small cell lung cancer cell	RPL8 :+: Ferroptosis	Validated
ALOX12	Arachidonate 12-lipoxygenase, 12S type	HGNC:429	Silencing ALOX genes made cells resistant to ferroptosis.	qPCR	Human	NRAS mutant HT-1080 fibrosarcoma cells; KRAS mutant Calu-1 non small cell lung cancer cell	RPL8 :+: Ferroptosis	Validated
ALOX12B	Arachidonate 12-lipoxygenase, 12R type	HGNC:430	Silencing ALOX genes made cells resistant to ferroptosis.	qPCR	Human	NRAS mutant HT-1080 fibrosarcoma cells; KRAS mutant Calu-1 non small cell lung cancer cell	RPL8 :+: Ferroptosis	Validated
ALOX15	Arachidonate 15-lipoxygenase	HGNC:433	Silencing ALOX genes made cells resistant to ferroptosis.	qPCR	Human	NRAS mutant HT-1080 fibrosarcoma cells; KRAS mutant Calu-1 non small cell lung cancer cell	RPL8 :+: Ferroptosis	Validated
ALOX15B	Arachidonate 15-lipoxygenase type B	HGNC:434	Silencing ALOX genes made cells resistant to ferroptosis. Erastin-induced cell death was rescued by silencing either ALOX15B or ALOXE3, which supported the hypothesis that lipoxygenases are required for ferroptosis.	qPCR, siRNA	Human	NRAS mutant HT-1080 fibrosarcoma cells; KRAS mutant Calu-1 non small cell lung cancer cell	RPL8 :+: Ferroptosis	Validated
ALOXE3	Arachidonate lipoxygenase 3	HGNC:13743	Silencing ALOX genes made cells resistant to ferroptosis. Erastin-induced cell death was rescued by silencing either ALOX15B or ALOXE3, which supported the hypothesis that lipoxygenases are required for ferroptosis.	qPCR, siRNA	Human	NRAS mutant HT-1080 fibrosarcoma cells; KRAS mutant Calu-1 non small cell lung cancer cell	RPL8 :+: Ferroptosis	Validated
PHKG2	Phosphorylase kinase catalytic subunit gamma 2	HGNC:8931	U-2-OS cells became resistant to erastin upon PHKG2 silencing. Erastin-treated HT-1080 cells were rescued by shPHKG2.	shRNA suppressor screen, qPCR, cellular iron staining, cell viability	Human	NRAS mutant HT-1080 fibrosarcoma cells; KRAS mutant Calu-1 non small cell lung cancer cell	RPL8 :+: Ferroptosis	Validated
ULK1	Unc-51 like autophagy activating kinase 1	HGNC:12558	Potential positive regulators of ferroptosis. Knockout of ULK1 led to significantly lower levels of erastin-induced ferroptosis in a dose- and time-dependent manner.	RNAi screening, gene knockout	Mice	HT22 cells	PIK3CA :-: GSH, GSH :-: Lipid ROS, Lipid ROS :+: Ferroptosis	Validated
ATG3	Autophagy related 3	HGNC:20962	Potential positive regulators of ferroptosis. Knockout of ATG3 greatly reduced the sensitivity of MEFs to ferropotosis, and reconstituting ATG3 back to these cells restored the ferroptosis sensitivity.	RNAi screening, gene knockout	Mice	HT22 cells	PIK3CA :-: GSH, GSH :-: Lipid ROS, Lipid ROS :+: Ferroptosis	Validated
ATG13	Autophagy related 13	HGNC:29091	Knockout of ATG13 greatly reduced the sensitivity of MEFs to ferropotosis, and reconstituting ATG13 back to these cells restored the ferroptosis sensitivity.	Gene knockout	Mice	HT22 cells	PIK3CA :-: GSH, GSH :-: Lipid ROS, Lipid ROS :+: Ferroptosis	Validated
ULK2	Unc-51 like autophagy activating kinase 2	HGNC:13480	Knockout of ULK2 led to significantly lower levels of erastin-induced ferroptosis in a dose- and time-dependent manner.	Gene knockout	Mice	HT22 cells	PIK3CA :-: GSH, GSH :-: Lipid ROS, Lipid ROS :+: Ferroptosis	Validated
SAT1	Spermidine/spermine N1-acetyltransferase 1	HGNC:10540	p53-mediated activation of SAT1 contributes to ferroptotic cell death in the presence of ROS stress. Knockdown of Sat1 partially rescued ROS-induced ferroptosis.	qRT-PCR, siRNA, CRISPR-cas9, western blot	Human, mice	H1299, U2OS and MCF7 cells, mouse embryonic fibroblasts	TP53 :-: SLC7A11, SLC7A11 :+: Cystine, Cystine :-: Ferroptosis	Validated
EGFR	Epidermal growth factor receptor	HGNC:3236	Cell death in activated EGFR mutant cells occurs by ferroptosis. Inhibiting EGFR and MAPK signaling rescued cell viability following cystine withdrawal.	Fluorescence-activated cell sorting (FACS) analysis, cell viability	Human	NRAS mutant HT-1080 fibrosarcoma cells; KRAS mutant Calu-1 non small cell lung cancer cell	RPL8 :+: Ferroptosis	Validated
NOX4	NADPH oxidase 4	HGNC:7891	Inhibition of NADPH oxidase 4 (NOX4) blocked ferroptosis.	Fluorescence-activated cell sorting (FACS) analysis, cell viability	Human	NRAS mutant HT-1080 fibrosarcoma cells; KRAS mutant Calu-1 non small cell lung cancer cell	RPL8 :+: Ferroptosis	Validated
MAPK3	Mitogen-activated protein kinase 3	HGNC:6877	Inhibiting EGFR and MAPK signaling rescued cell viability following cystine withdrawal.	Immunoblots, lucifer yellow infiltration, cell viability, fluorescence-activated cell sorting (FACS) analysis	Human	NRAS mutant HT-1080 fibrosarcoma cells; KRAS mutant Calu-1 non small cell lung cancer cell	RPL8 :+: Ferroptosis	Validated
MAPK1	Mitogen-activated protein kinase 1	HGNC:6871	Inhibiting EGFR and MAPK signaling rescued cell viability following cystine withdrawal.	Immunoblots, lucifer yellow infiltration, cell viability, fluorescence-activated cell sorting (FACS) analysis	Human	NRAS mutant HT-1080 fibrosarcoma cells; KRAS mutant Calu-1 non small cell lung cancer cell	RPL8 :+: Ferroptosis	Validated
BID	BH3 interacting domain death agonist	HGNC:1050	BID deletion prevents erastin- and glutamate-induced cell death. BID inhibition inhibited erastin-induced ferroptosis.	Cell viability, western blot, CRISPR/Cas9, gene transfection	Mice	HT22 cells	PIK3CA :-: GSH, GSH :-: Lipid ROS, Lipid ROS :+: Ferroptosis	Validated
ZEB1	Zinc finger E-box binding homeobox 1	HGNC:11642	Knockout of ZEB1 prevents cell death induced by GPX4 inhibition.	sgRNA, cell viability	Human	NRAS mutant HT-1080 fibrosarcoma cells; KRAS mutant Calu-1 non small cell lung cancer cell	RPL8 :+: Ferroptosis	Validated
DPP4	Dipeptidyl peptidase 4	HGNC:3009	Required for ferroptosis in TP53-deficient CRC cells.	Cell death, RNAi, western blot, enzyme activity	Human, mice	H1299, U2OS and MCF7 cells, mouse embryonic fibroblasts	TP53 :-: SLC7A11, SLC7A11 :+: Cystine, Cystine :-: Ferroptosis	Validated
CDKN2A	Cyclin dependent kinase inhibitor 2A	HGNC:1787	Combination of ARF induction and ROS treatment induced ferroptotic cell death. Knockdown of endogenous ARF protected cells from ROS-induced cell death.	RNAi, immunoblot, phase-contrast image, cell death quantification	Human, mice	H1299, U2OS and MCF7 cells, mouse embryonic fibroblasts	TP53 :-: SLC7A11, SLC7A11 :+: Cystine, Cystine :-: Ferroptosis	Validated
PEBP1	Phosphatidylethanolamine binding protein 1	HGNC:8630	Elevated levels of PEBP1 resulted in increased sensitivity of HK2 cells to RSL3 whereas lowered contents of PEBP1 in HAEC and HT22 cells were associated with decreased sensitivity to ferroptosis.	Western blot, siRNA, cell death assay	Human, mice	H1299, U2OS and MCF7 cells, mouse embryonic fibroblasts	TP53 :-: SLC7A11, SLC7A11 :+: Cystine, Cystine :-: Ferroptosis	Validated
SOCS1	Suppressor of cytokine signaling 1	HGNC:19383	Expression of SOCS1 sensitized cells to ferroptosis inducer. This effect of SOCS1 was efficiently blocked by ferroptosis inhibitor. Expression of SOCS1 reduced the levels of GSH, explaining in part its ability to sensitize cells to ferroptosis.	Cell death assay, cell viability assay, qPCR	Human	NRAS mutant HT-1080 fibrosarcoma cells; KRAS mutant Calu-1 non small cell lung cancer cell	RPL8 :+: Ferroptosis	Validated
CDO1	Cysteine dioxygenase type 1	HGNC:1795	CDO1 suppression contributes to ferroptosis resistance.	siRNA, western blot, MTT assay	Human	NRAS mutant HT-1080 fibrosarcoma cells; KRAS mutant Calu-1 non small cell lung cancer cell	RPL8 :+: Ferroptosis	Validated
MYB	MYB proto-oncogene, transcription factor	HGNC:7545	Erastin-induced ferroptosis was restrained when c-Myb was suppressed.	Western blot, siRNA, qRT-PCR, MTT assay	Human	NRAS mutant HT-1080 fibrosarcoma cells; KRAS mutant Calu-1 non small cell lung cancer cell	RPL8 :+: Ferroptosis	Validated
MAPK8	Mitogen-activated protein kinase 8	HGNC:6881	JNK1/2 inhibitors inhibited t-BHP-induced ferroptosis. t-BHP treatment significantly increased the protein expression of p-JNK.	MitoSOX probe, luminometer kit, C11-BODIPY probe, western blot	Rat	PC12 cells	MAPK8 :+: Lipid ROS, Lipid ROS :+: Ferroptosis	Validated
MAPK9	Mitogen-activated protein kinase 9	HGNC:6886	JNK1/2 inhibitors inhibited t-BHP-induced ferroptosis. t-BHP treatment significantly increased the protein expression of p-JNK.	MitoSOX probe, luminometer kit, C11-BODIPY probe, western blot	Rat	PC12 cells	MAPK8 :+: Lipid ROS, Lipid ROS :+: Ferroptosis	Validated
CHAC1	ChaC glutathione specific gamma-glutamylcyclotransferase 1	HGNC:28680	CHAC1 degradation of GSH might enhance cystine-starvation-induced cell death.	Western blot, real-time PCR, cell viability assay, siRNA, GSH assay kit	Human	NRAS mutant HT-1080 fibrosarcoma cells; KRAS mutant Calu-1 non small cell lung cancer cell	RPL8 :+: Ferroptosis	Validated
MAPK14	Mitogen-activated protein kinase 14	HGNC:6876	Ferroptosis was blocked by inhibiting p38 MAPK activation.	Cell viability assay, lipid ROS measurement, RT-qPCR, western blot	Mice	HT22 cells	PIK3CA :-: GSH, GSH :-: Lipid ROS, Lipid ROS :+: Ferroptosis	Validated
LINC00472	Long intergenic non-protein coding RNA 472	HGNC:21380	Increases erastin-induced growth inhibition, whereas depletion of P53RRA decreased erastin-induced growth inhibition.	Bisulfite sequencing, RNA pull-down, mass spectrometry, RNA immunoprecipitation, qRT-PCR, cell viability assay	Human	NRAS mutant HT-1080 fibrosarcoma cells; KRAS mutant Calu-1 non small cell lung cancer cell	RPL8 :+: Ferroptosis	Validated
BECN1	Beclin 1	HGNC:1034	Knockdown inhibits ferroptosis. Overexpression increases ferroptotic cancer cell death.	shRNA, western blot, cell viability assay, gene overexpression	Human, mice	H1299, U2OS and MCF7 cells, mouse embryonic fibroblasts	TP53 :-: SLC7A11, SLC7A11 :+: Cystine, Cystine :-: Ferroptosis	Validated
PRKAA2	Protein kinase AMP-activated catalytic subunit alpha 2	HGNC:9377	Inhibition of PRKAA/AMPKalpha diminishes ferroptosis.	siRNA, western blot, cell viability assay, GSH assay, lipid peroxidation assay, iron assay	Human	NRAS mutant HT-1080 fibrosarcoma cells; KRAS mutant Calu-1 non small cell lung cancer cell	RPL8 :+: Ferroptosis	Validated
PRKAA1	Protein kinase AMP-activated catalytic subunit alpha 1	HGNC:9376	Inhibition of PRKAA/AMPKalpha diminishes ferroptosis.	siRNA, western blot, cell viability assay, GSH assay, lipid peroxidation assay, iron assay	Human	NRAS mutant HT-1080 fibrosarcoma cells; KRAS mutant Calu-1 non small cell lung cancer cell	RPL8 :+: Ferroptosis	Validated
ELAVL1	ELAV like RNA binding protein 1	HGNC:3312	ELAVL1 siRNA led to ferroptosis resistance, whereas ELAVL1 plasmid contributed to classical ferroptotic events.	Immunohistochemistry, hydroxyproline assay, immunofluorescence, cell viability assay, western blot, qPCR, iron assay, ROS assay, RNAi	Human, mice	H1299, U2OS and MCF7 cells, mouse embryonic fibroblasts	TP53 :-: SLC7A11, SLC7A11 :+: Cystine, Cystine :-: Ferroptosis	Validated
BAP1	BRCA1 associated protein 1	HGNC:950	Suppresses SLC7A11-mediated cystine uptake and promotes ferroptosis. BAP1 mutants lose their abilities to repress SLC7A11 and to promote ferroptosis.	Flow cytometry, cell viability assay, cell death assay, western blot, gene knockout, lipid peroxidation assay, cystine uptake assay, GSH assay, RT-PCR, ChIP-qPCR, luciferase reporter assay, immunoprecipitation, IHC, ChIP-seq	Human	NRAS mutant HT-1080 fibrosarcoma cells; KRAS mutant Calu-1 non small cell lung cancer cell	RPL8 :+: Ferroptosis	Validated
ABCC1	ATP binding cassette subfamily C member 1	HGNC:51	Accelerates ferroptosis. Disruption of MRP1 inhibited ferroptosis potently.	Western blot, GSH assay, dead cell counts, gene transfection, CRISPR/Cas9, cell viability assay, RT-qPCR	Human	NRAS mutant HT-1080 fibrosarcoma cells; KRAS mutant Calu-1 non small cell lung cancer cell	RPL8 :+: Ferroptosis	Validated
MIR6852	microRNA 6852	HGNC:49993	Promotes ferroptosis. Binds to LINC0033 and serves as a negative upstream regulator of CBS-mediated ferroptosis inhibition.	qRT-PCR, gene knockdown, luciferase assay, gene overexpression, MTT assay, colony-formation assay	Human	NRAS mutant HT-1080 fibrosarcoma cells; KRAS mutant Calu-1 non small cell lung cancer cell	RPL8 :+: Ferroptosis	Validated
ACVR1B	Activin A receptor type 1B	HGNC:172	Inhibition attenuated erastin-induced ferroptosis.	Western blot, siRNA, glutathione assay, RT-PCR, cell viability assay	Human	NRAS mutant HT-1080 fibrosarcoma cells; KRAS mutant Calu-1 non small cell lung cancer cell	RPL8 :+: Ferroptosis	Validated
TGFBR1	Transforming growth factor beta receptor 1	HGNC:11772	Inhibition attenuated erastin-induced ferroptosis.	Western blot, siRNA, glutathione assay, RT-PCR, cell viability assay	Human	NRAS mutant HT-1080 fibrosarcoma cells; KRAS mutant Calu-1 non small cell lung cancer cell	RPL8 :+: Ferroptosis	Validated
EPAS1	Endothelial PAS domain protein 1	HGNC:3374	A driver of ferroptosis susceptibility. Ablation reduced susceptibility to ferroptosis.	CRISPR, sgRNA, shRNA, immunoblot, cell viability, western blot	Mice	HT22 cells	PIK3CA :-: GSH, GSH :-: Lipid ROS, Lipid ROS :+: Ferroptosis	Validated
HILPDA	Hypoxia inducible lipid droplet associated	HGNC:28859	Promotes ferroptosis sensitivity downstream of HIF-2alpha.	RNA-Seq, western blot, qRT-PCR, shRNA, cell viability, immunoblot	Mice	HT22 cells	PIK3CA :-: GSH, GSH :-: Lipid ROS, Lipid ROS :+: Ferroptosis	Validated
HIF1A	Hypoxia inducible factor 1 subunit alpha	HGNC:4910	Re-sensitized HIF-2alpha-null cells to ferroptosis. Induce ferroptosis sensitivity in cancer cells.	cDNA screenin, cell viability	Mice	HT22 cells	PIK3CA :-: GSH, GSH :-: Lipid ROS, Lipid ROS :+: Ferroptosis	Validated
IFNG	Interferon gamma	HGNC:5438	Interferon gamma released from CD8+ T cells downregulates the expression of SLC3A2 and SLC7A11, and as a consequence, promotes tumour cell lipid peroxidation and ferroptosis.	BODIPY-C11, liperfluo staining, cell death measurement, FACS, cell proliferation and viability assay, qPCR, immunoblotting, glutathione quantification, MDA assay, glutamate assay	Human, mice	H1299, U2OS and MCF7 cells, mouse embryonic fibroblasts	TP53 :-: SLC7A11, SLC7A11 :+: Cystine, Cystine :-: Ferroptosis	Validated
ANO6	Anoctamin 6	HGNC:25240	Essential for ferroptosis. Inhibition blocked ferroptotic cell death induced by RSL3/erastin.	Immunocytochemistry, RT-PCR, TUNEL Assay, flow Cytometry, LDH assay, gene knockout, siRNA	Human, mice	H1299, U2OS and MCF7 cells, mouse embryonic fibroblasts	TP53 :-: SLC7A11, SLC7A11 :+: Cystine, Cystine :-: Ferroptosis	Validated
LPIN1	Lipin 1	HGNC:13345	Overexpression of adipose lipin‐1 in mice facilitated the onset of hepatic ferroptosis.	Enzyme‐linked immunosorbent assay, lipid peroxidation assay, iron assay, MDA assay, qPCR, GSH assay	Mice	HT22 cells	PIK3CA :-: GSH, GSH :-: Lipid ROS, Lipid ROS :+: Ferroptosis	Validated
HMGB1	High mobility group box 1	HGNC:4983	Required for erastin-induced ferroptosis. Knockdown of HMGB1 decreased erastin-induced cell death.	Gene transfection, RNAi, cell viability assay, ELISA, LDH assay, flow cytometry, qPCR, western blot, electron microscopy	Human, mice	H1299, U2OS and MCF7 cells, mouse embryonic fibroblasts	TP53 :-: SLC7A11, SLC7A11 :+: Cystine, Cystine :-: Ferroptosis	Validated
TNFAIP3	TNF alpha induced protein 3	HGNC:11896	Overexpression increased ROS generation and enhanced erastin-induced ferroptosis, whereas knockdown inhibited erastin-induced ferroptosis.	Lentivirus transduction, CCK-8 assay, DYE670 staining assay, ROS staining assay, RT-qPCR, western blot	Human	NRAS mutant HT-1080 fibrosarcoma cells; KRAS mutant Calu-1 non small cell lung cancer cell	RPL8 :+: Ferroptosis	Validated
TLR4	Toll like receptor 4	HGNC:11850	Knockdown inhibited ferroptosis.	Immunohistochemistry, western blot, cell death assay, siRNA	Rat	PC12 cells	MAPK8 :+: Lipid ROS, Lipid ROS :+: Ferroptosis	Validated
ATF3	Activating transcription factor 3	HGNC:785	Promotes ferroptosis induced by erastin.	Cell viability assay, transfection, lentiviral infection, qRT-PCR, western blot	Human	NRAS mutant HT-1080 fibrosarcoma cells; KRAS mutant Calu-1 non small cell lung cancer cell	RPL8 :+: Ferroptosis	Validated
ATM	ATM serine/threonine kinase	HGNC:795	Essential for ferroptosis. Genetic knockdown and chemical inhibition of ATM both suppress ferroptotic cell death.	siRNA, western blot, nuclear/cytosol fraction, cell viability, cell death, GSH assay, kinome screen, qRT-PCR, immunofluorescence assay	Human	NRAS mutant HT-1080 fibrosarcoma cells; KRAS mutant Calu-1 non small cell lung cancer cell	RPL8 :+: Ferroptosis	Validated
YY1AP1	YY1 associated protein 1	HGNC:30935	Makes cells more sensitive to ferroptosis. Cells lacking YAP were no longer sensitised to ferroptosis.	Cell death, cell viability, lipid peroxidation, immunoblotting, CRISPR/Cas9, ChIP assay, qRT-PCR	Human, mice	H1299, U2OS and MCF7 cells, mouse embryonic fibroblasts	TP53 :-: SLC7A11, SLC7A11 :+: Cystine, Cystine :-: Ferroptosis	Validated
EGLN2	Egl-9 family hypoxia inducible factor 2	HGNC:14660	Inhibiting EGLN2 activation diminished ferroptotic tumor cell death.	Cytotoxicity assays, western blot, immunoprecipitation, RNA interference, gene transfection, qPCR, MDA assay	Human, mice	H1299, U2OS and MCF7 cells, mouse embryonic fibroblasts	TP53 :-: SLC7A11, SLC7A11 :+: Cystine, Cystine :-: Ferroptosis	Validated
MIOX	Myo-inositol oxygenase	HGNC:14522	Overexpression exacerbates cell death, knockdown inhibits ferroptosis.	MTT assay, measurement of GPX4 activity, labile iron pool assay, evaluation of cell death and cell morphology, immunohistochemical staining	Human, mice	H1299, U2OS and MCF7 cells, mouse embryonic fibroblasts	TP53 :-: SLC7A11, SLC7A11 :+: Cystine, Cystine :-: Ferroptosis	Validated
TAZ	Tafazzin	HGNC:11577	TAZ removal confers ferroptosis resistance, whereas overexpression of TAZS89A sensitizes cells to ferroptosis.	Cell viability, cell death, western blot, siRNA, qRT-PCR, microarray, immunofluorescence staining, ChIP-seq, Lipid ROS assay	Human, mice	H1299, U2OS and MCF7 cells, mouse embryonic fibroblasts	TP53 :-: SLC7A11, SLC7A11 :+: Cystine, Cystine :-: Ferroptosis	Validated
MTDH	Metadherin	HGNC:29608	Can enhance sensitivity to inducers of ferroptosis. Enhances the vulnerability of cancer cells to ferroptosis.	Cell viability, qRT-PCR, western blotting, GSH assay, GPx4 activity assay, tumor xenograft model	Human, mice	H1299, U2OS and MCF7 cells, mouse embryonic fibroblasts	TP53 :-: SLC7A11, SLC7A11 :+: Cystine, Cystine :-: Ferroptosis	Validated
IDH1	Isocitrate dehydrogenase (NADP(+)) 1	HGNC:5382	Deletion of the mutant IDH1 allele or pharmacological inhibition of mutant IDH1 confers resistance to erastin-induced ferroptosis. Ectopic expression of mutant IDH1 promotes ferroptosis.	Cell transfection, cell viability, GSH assay, lipid ROS assay	Human	NRAS mutant HT-1080 fibrosarcoma cells; KRAS mutant Calu-1 non small cell lung cancer cell	RPL8 :+: Ferroptosis	Validated
PANX1	Pannexin 1	HGNC:8599	Deletion protects against ferroptotic cell death. Silenced Panx1 expression significantly attenuated ferroptotic lipid peroxidation and iron accumulation induced by the ferroptosis inducer erastin.	Cell viability, cell death, qRT-PCR, western blot, lipid peroxidation detection, shRNA	Human, mice	H1299, U2OS and MCF7 cells, mouse embryonic fibroblasts	TP53 :-: SLC7A11, SLC7A11 :+: Cystine, Cystine :-: Ferroptosis	Validated
BACH1	BTB domain and CNC homolog 1	HGNC:935	Promotes ferroptosis by repressing the transcription of a subset of the erastin-induced protective genes.	Western blotting, qPCR, cell death, labile iron detection, RNA-seq	Mice	HT22 cells	PIK3CA :-: GSH, GSH :-: Lipid ROS, Lipid ROS :+: Ferroptosis	Validated
LONP1	Lon peptidase 1, mitochondrial	HGNC:9479	Inhibition of LONP1 negatively regulates erastin-induced cell death.	Cell viability, western blot, qRT-PCR, lipid peroxidation assay, glutathione assay	Human	NRAS mutant HT-1080 fibrosarcoma cells; KRAS mutant Calu-1 non small cell lung cancer cell	RPL8 :+: Ferroptosis	Validated
SLC7A11	Solute carrier family 7 member 11	HGNC:11059	Silencing of SLC7A11 sensitized HT-1080 cells to erastin-induced death, whereas transfection of HT-1080 cells with a plasmid encoding SLC7A11 conferred protection from erastin- and sulfasalazine-induced death.	RT-qPCR, siRNA, gene transfection, cell viability	Human	HT-1080 cells	SLC7A11 :+: Cystine, Cystine :-: Ferroptosis	Validated
GPX4	Glutathione peroxidase 4	HGNC:4556	RNAi-mediated GPX4 knockdown induces ferroptosis.	Affinity-based chemoproteomics, western blotting, and RNAi	Human, mice	HRAS mutant BJeLR-engineered tumor cells, HT-1080 cells, xenograft mouse model (athymic nude mice injected with four million HT-1080 cells)	GPX4 :-: Lipid ROS, Lipid ROS :+: Ferroptosis	Validated
AKR1C1	Aldo-keto reductase family 1 member C1	HGNC:384	Up-regulated in DU-145 erastin-resistant clones. Participate in the detoxification of toxic lipid metabolites. May confer partial resistance to erastin by enhancing the detoxification of reactive aldehydes generated downstream of the oxidative destruction of the plasma membrane during ferroptosis.	RNA interference, cell viability assay, oxidative stress measurement	Human, mice	HRAS mutant BJeLR-engineered tumor cells, HT-1080 cells, xenograft mouse model (athymic nude mice injected with four million HT-1080 cells)	GPX4 :-: Lipid ROS, Lipid ROS :+: Ferroptosis	Validated
AKR1C2	Aldo-keto reductase family 1 member C2	HGNC:385	Up-regulated in DU-145 erastin-resistant clones. Participate in the detoxification of toxic lipid metabolites. May confer partial resistance to erastin by enhancing the detoxification of reactive aldehydes generated downstream of the oxidative destruction of the plasma membrane during ferroptosis.	RNA interference, cell viability assay, oxidative stress measurement	Human, mice	HRAS mutant BJeLR-engineered tumor cells, HT-1080 cells, xenograft mouse model (athymic nude mice injected with four million HT-1080 cells)	GPX4 :-: Lipid ROS, Lipid ROS :+: Ferroptosis	Validated
AKR1C3	Aldo-keto reductase family 1 member C3	HGNC:386	Up-regulated in DU-145 erastin-resistant clones. Participate in the detoxification of toxic lipid metabolites. May confer partial resistance to erastin by enhancing the detoxification of reactive aldehydes generated downstream of the oxidative destruction of the plasma membrane during ferroptosis.	RNA interference, cell viability assay, oxidative stress measurement	Human, mice	HRAS mutant BJeLR-engineered tumor cells, HT-1080 cells, xenograft mouse model (athymic nude mice injected with four million HT-1080 cells)	GPX4 :-: Lipid ROS, Lipid ROS :+: Ferroptosis	Validated
RB1	RB transcriptional corepressor 1	HGNC:9884	Rb knock-down cells exposed to sorafenib encounter ferroptosis. Lack of Rb sensitized HCC cells to the induction of ferroptosis.	RNA interference, cell viability assay, oxidative stress measurement	Human, mice	HRAS mutant BJeLR-engineered tumor cells, HT-1080 cells, xenograft mouse model (athymic nude mice injected with four million HT-1080 cells)	GPX4 :-: Lipid ROS, Lipid ROS :+: Ferroptosis	Validated
HSPB1	Heat shock protein family B (small) member 1	HGNC:5246	Knockdown of HSF1 and HSPB1 enhances erastin-induced ferroptosis, whereas heat shock pretreatment and overexpression of HSPB1 inhibits erastin-induced ferroptosis.	RNAi, RT-qPCR, western blot, cell viability	Human, mice	HRAS mutant BJeLR-engineered tumor cells, HT-1080 cells, xenograft mouse model (athymic nude mice injected with four million HT-1080 cells)	GPX4 :-: Lipid ROS, Lipid ROS :+: Ferroptosis	Validated
HSF1	Heat shock transcription factor 1	HGNC:5224	Knockdown of HSF1 and HSPB1 enhances erastin-induced ferroptosis, whereas heat shock pretreatment and overexpression of HSPB1 inhibits erastin-induced ferroptosis.	RNAi, RT-qPCR, western blot, cell viability	Human, mice	HRAS mutant BJeLR-engineered tumor cells, HT-1080 cells, xenograft mouse model (athymic nude mice injected with four million HT-1080 cells)	GPX4 :-: Lipid ROS, Lipid ROS :+: Ferroptosis	Validated
GCLC	Glutamate-cysteine ligase catalytic subunit	HGNC:4311	RNAi knockdown sensitized cell death induced by cystine starvation.	RNAi, qPCR	Mice	T cells	GPX4 :-: Ferroptosis	Validated
NFE2L2	Nuclear factor, erythroid 2 like 2	HGNC:7782	NRF2 plays a central role in protecting hepatocellular carcinoma (HCC) cells against ferroptosis	Cell Viability Analysis, western blot, RNAi, qRT-PCR	Human, mice	HRAS mutant BJeLR-engineered tumor cells, HT-1080 cells, xenograft mouse model (athymic nude mice injected with four million HT-1080 cells)	GPX4 :-: Lipid ROS, Lipid ROS :+: Ferroptosis	Validated
SQSTM1	Sequestosome 1	HGNC:11280	The interaction between p62 and Keap1 increased following erastin and sorafenib treatment. Knockdown of p62 suppressed NRF2 expression and promoted growth inhibition with increased ferroptotic events including GSH depletion, lipid ROS production, and an increase of iron levels.	qRT‐PCR, RNA interference	Human, mice	HRAS mutant BJeLR-engineered tumor cells, HT-1080 cells, xenograft mouse model (athymic nude mice injected with four million HT-1080 cells)	GPX4 :-: Lipid ROS, Lipid ROS :+: Ferroptosis	Validated
NQO1	NAD(P)H quinone dehydrogenase 1	HGNC:2874	Knockdown of p62, quinone oxidoreductase‐1, heme oxygenase‐1, and ferritin heavy chain‐1 by RNA interference in HCC cells promoted ferroptosis in response to erastin and sorafenib.	qRT‐PCR, RNA interference	Human, mice	HRAS mutant BJeLR-engineered tumor cells, HT-1080 cells, xenograft mouse model (athymic nude mice injected with four million HT-1080 cells)	GPX4 :-: Lipid ROS, Lipid ROS :+: Ferroptosis	Validated
FTH1	Ferritin heavy chain 1	HGNC:3976	Knockdown of p62, quinone oxidoreductase‐1, heme oxygenase‐1, and ferritin heavy chain‐1 by RNA interference in HCC cells promoted ferroptosis in response to erastin and sorafenib.	qRT‐PCR, RNA interference	Human, mice	HRAS mutant BJeLR-engineered tumor cells, HT-1080 cells, xenograft mouse model (athymic nude mice injected with four million HT-1080 cells)	GPX4 :-: Lipid ROS, Lipid ROS :+: Ferroptosis	Validated
MUC1	Mucin 1, cell surface associated	HGNC:7508	MUC1-C (C-terminal subunit) blocks erastin-induced ferroptosis and induces increases in GSH.	shRNA, GSH level measurement, cell death test	Human	HT-1080 cells	SLC7A11 :+: Cystine, Cystine :-: Ferroptosis	Validated
SLC3A2	Solute carrier family 3 member 2	HGNC:11026	Required for in vitro cell survival because of its role in protecting cells from ferroptosis.	Cell survival test	Mice	T cells	GPX4 :-: Ferroptosis	Validated
MT1G	Metallothionein 1G	HGNC:7399	A negative regulator of ferroptosis in HCC cells. Knockdown of MT‐1G by RNA interference increases glutathione depletion and lipid peroxidation, which contributes to sorafenib‐induced ferroptosis.	RNA interference, cell viability assay, colony formation assay, western blot, qRT-PCR, glutathione assay, lipid peroxidation assay	Human, mice	HRAS mutant BJeLR-engineered tumor cells, HT-1080 cells, xenograft mouse model (athymic nude mice injected with four million HT-1080 cells)	GPX4 :-: Lipid ROS, Lipid ROS :+: Ferroptosis	Validated
SLC40A1	Solute carrier family 40 member 1	HGNC:10909	Involved in siramesine and lapatinib-induced ferroptotic cell death. Its expression is decreased after treatment with siramesine alone or in combination with lapatinib. Overexpression FPN resulted in decreased ROS and cell death whereas knockdown of FPN increased cell death after siramesine and lapatinib treatment.	RNA interference, cell viability assay, colony formation assay, western blot, qRT-PCR, glutathione assay, lipid peroxidation assay	Human, mice	HRAS mutant BJeLR-engineered tumor cells, HT-1080 cells, xenograft mouse model (athymic nude mice injected with four million HT-1080 cells)	GPX4 :-: Lipid ROS, Lipid ROS :+: Ferroptosis	Validated
CISD1	CDGSH iron sulfur domain 1	HGNC:30880	Genetic inhibition of CISD1 contributes to erastin-induced ferroptosis. Stabilization of the iron sulfur cluster of CISD1 inhibits ferroptosis.	Cytotoxicity assays, western blot, q-PCR, RNAi	Human	HT-1080 cells	SLC7A11 :+: Cystine, Cystine :-: Ferroptosis	Validated
FANCD2	FA complementation group D2	HGNC:3585	Inhibits erastin-induced ferroptosis. Plays a novel role in the negative regulation of ferroptosis.	Cell viability assay, Q-PCR, western blot, iron assay, lipid peroxidation assay, glutathione assay	Mice	T cells	GPX4 :-: Ferroptosis	Validated
FTMT	Ferritin mitochondrial	HGNC:17345	Overexpression significantly inhibited erastin-induced ferroptosis.	Cell viability assay, western blot	Mice, fly	SH-SY5Y cells, drosophila melanogasters W1118, elav-Gal4 and UAS-Fer3HCH	FTMT :-: Labile iron pool, Labile iron pool :+: Ferroptosis	Validated
HSPA5	Heat shock protein family A (Hsp70) member 5	HGNC:5238	Negatively regulates ferroptosis. Suppression of HSPA5 expression increased erastin-induced death. Overexpressed HSPA5 inhibited erastin-induced ferroptotic cell death.	Cell viability assay, western blot, shRNA, gene transfection	Human, mice	HRAS mutant BJeLR-engineered tumor cells, HT-1080 cells, xenograft mouse model (athymic nude mice injected with four million HT-1080 cells)	GPX4 :-: Lipid ROS, Lipid ROS :+: Ferroptosis	Validated
ATF4	Activating transcription factor 4	HGNC:786	Inhibition of ATF4 expression increased erastin-induced cell death. ATF4 results in the induction of HSPA5, which in turn protects against GPX4 protein degradation and subsequent ferroptosis.	CCK8 cell viability assay, clonogenic cell survival assay, western blot, q-PCR, RNAi	Human	HT-1080 cells	SLC7A11 :+: Cystine, Cystine :-: Ferroptosis	Validated
HELLS	Helicase, lymphoid specific	HGNC:4861	LSH inhibits ferroptosis by decreasing the intracellular levels of iron and lipid ROS.	Plate-colony formation assay; measurement of total ROS, Lipid ROS, and intracellular iron	Human, mice	HRAS mutant BJeLR-engineered tumor cells, HT-1080 cells, xenograft mouse model (athymic nude mice injected with four million HT-1080 cells)	GPX4 :-: Lipid ROS, Lipid ROS :+: Ferroptosis	Validated
SCD	Stearoyl-CoA desaturase	HGNC:10571	Depletion of the SCD1 and FADS2 metabolic genes induces ferroptosis.	shRNA, RT-qPCR, MTT assay, total iron detection, lipid ROS detection	Human	HT-1080 cells	SLC7A11 :+: Cystine, Cystine :-: Ferroptosis	Validated
FADS2	Fatty acid desaturase 2	HGNC:3575	Depletion of the SCD1 and FADS2 metabolic genes induces ferroptosis.	shRNA, RT-qPCR, MTT assay, total iron detection, lipid ROS detection	Human	HT-1080 cells	SLC7A11 :+: Cystine, Cystine :-: Ferroptosis	Validated
SRC	SRC proto-oncogene, non-receptor tyrosine kinase	HGNC:11283	Src-STAT3 activation renders the cell unable to undergo to ferroptosis. Src inhibition decreased cell viability significantly, and that loss of viability was rescued by ferroptosis inhibitors.	Immunoblotting, RNAi, qPCR, western blot, cell viability	Human	HT-1080 cells	SLC7A11 :+: Cystine, Cystine :-: Ferroptosis	Validated
STAT3	Signal transducer and activator of transcription 3	HGNC:11364	Src-STAT3 activation renders the cell unable to undergo to ferroptosis.	Immunoblotting, RNAi, qPCR, western blot, cell viability	Human	HT-1080 cells	SLC7A11 :+: Cystine, Cystine :-: Ferroptosis	Validated
PML	Promyelocytic leukemia	HGNC:9113	PML expression turned cells highly resistant to ferroptosis.	Cell death assessment	Human	HT-1080 cells	SLC7A11 :+: Cystine, Cystine :-: Ferroptosis	Validated
MTOR	Mechanistic target of rapamycin kinase	HGNC:3942	Necessary and sufficient to protect cardiomyocyte cells against ferroptotic cell death. mTOR overexpression suppressed ferroptotic cell death, whereas mTOR deletion exaggerated cell death.	Cell viability assay, ROS production assay, western blot	Mice	T cells	GPX4 :-: Ferroptosis	Validated
NFS1	NFS1 cysteine desulfurase	HGNC:15910	Suppression of NFS1 cooperates with inhibition of cysteine transport to trigger ferroptosis in vitro and slow tumour growth. Suppression of NFS1 predisposes cancer cells to ferroptosis.	RNAi, cell viability assay,flow cytometry	Human	HT-1080 cells	SLC7A11 :+: Cystine, Cystine :-: Ferroptosis	Validated
TP63	Tumor protein p63	HGNC:15979	Delta Np63 alpha can inhibit ferroptosis independent of p53. Overexpression protects cells from ferroptosis-inducing agents.	siRNA, cell death quantification	Human	HT-1080 cells	SLC7A11 :+: Cystine, Cystine :-: Ferroptosis	Validated
CDKN1A	Cyclin dependent kinase inhibitor 1A	HGNC:1784	Required to to suppress ferroptosis.	CRISPR, shRNA, immunoblotting, cell-cycle profile, cell death quantification	Human	HT-1080 cells	SLC7A11 :+: Cystine, Cystine :-: Ferroptosis	Validated
MIR137	microRNA 137	HGNC:31523	Suppresses ferroptosis both in vitro and in vivo.	Immunoblotting, luciferase reporter assay, qRT-PCR, cell viability assay, colony formation assay, malondialdehyde assay, iron assay, flow cytometer, shRNA, xenograph mouse model	Human, mice	HRAS mutant BJeLR-engineered tumor cells, HT-1080 cells, xenograft mouse model (athymic nude mice injected with four million HT-1080 cells)	GPX4 :-: Lipid ROS, Lipid ROS :+: Ferroptosis	Validated
ENPP2	Ectonucleotide pyrophosphatase/phosphodiesterase 2	HGNC:3357	Overexpression modestly promotes migration and proliferation and significantly inhibits erastin-induced ferroptosis.	Cell viability assay, qRT-PCR, western blot, ROS measurement, ELISA	Rat	H9c2 cells	ENPP2 :-: Ferroptosis	Validated
FH	Fumarate hydratase	HGNC:3700	FH inactivation (FH-/- ) proves synthetic lethal with inducers of ferroptosis. FH-/- sensitizes cells to multiple ferroptosis inducers.	CRISPR/Cas9, sgRNA, cell viability assay, immunoblotting, qPCR,	Human	HT-1080 cells	SLC7A11 :+: Cystine, Cystine :-: Ferroptosis	Validated
CISD2	CDGSH iron sulfur domain 2	HGNC:24212	Overexpression conferred resistance to ferroptosis. Inhibition blocked resistance to ferroptotic cell death.	Cell viability and death assay, GSH and ROS levels and lipid peroxidation assays, RNAi, gene transfection, immunoblotting	Human	HT-1080 cells	SLC7A11 :+: Cystine, Cystine :-: Ferroptosis	Validated
MIR9-1	microRNA 9-1	HGNC:31641	Overexpression of miR‐9 suppressed GOT1, which subsequently reduced ferroptosis. Suppression of miR‐9 increased the sensitivity of melanoma cells to ferroptosis inducers.	Immunoblotting, luciferase reporter assay, qPCR, cell viability assay, MDA assay, iron assay, glutamate assay	Human	HT-1080 cells	SLC7A11 :+: Cystine, Cystine :-: Ferroptosis	Validated
MIR9-2	microRNA 9-2	HGNC:31642	Overexpression of miR‐9 suppressed GOT1, which subsequently reduced ferroptosis. Suppression of miR‐9 increased the sensitivity of melanoma cells to ferroptosis inducers.	Immunoblotting, luciferase reporter assay, qPCR, cell viability assay, MDA assay, iron assay, glutamate assay	Human	HT-1080 cells	SLC7A11 :+: Cystine, Cystine :-: Ferroptosis	Validated
MIR9-3	microRNA 9-3	HGNC:31646	Overexpression of miR‐9 suppressed GOT1, which subsequently reduced ferroptosis. Suppression of miR‐9 increased the sensitivity of melanoma cells to ferroptosis inducers.	Immunoblotting, luciferase reporter assay, qPCR, cell viability assay, MDA assay, iron assay, glutamate assay	Human	HT-1080 cells	SLC7A11 :+: Cystine, Cystine :-: Ferroptosis	Validated
CBS	Cystathionine beta-synthase	HGNC:1550	Inhibition triggers ferroptosis in hepatocellular carcinoma.	Cell viability, western blotting, LC/ESI-MS/MS, flow cytometry, xenograft mice	Human, mice	HRAS mutant BJeLR-engineered tumor cells, HT-1080 cells, xenograft mouse model (athymic nude mice injected with four million HT-1080 cells)	GPX4 :-: Lipid ROS, Lipid ROS :+: Ferroptosis	Validated
ISCU	Iron-sulfur cluster assembly enzyme	HGNC:29882	Over expression significantly attenuated DHA induced ferroptosis.	Cell viability, cell cycle, ROS determination, western blot, immunofluorescence, ectopic expressing, lentiviral transduction	Human	HT-1080 cells	SLC7A11 :+: Cystine, Cystine :-: Ferroptosis	Validated
ACSL3	Acyl-CoA synthetase long chain family member 3	HGNC:3570	Required for exogenous monounsaturated fatty acids to protect cells against ferroptosis. Negatively correlates with ferroptosis sensitivity.	Dead cell count, gene knockout, confocal imaging, thin-layer chromatography, BODIPY 493/503 imaging, CRISPR/Cas9, RT-qPCR, western blot	Human	HT-1080 cells	SLC7A11 :+: Cystine, Cystine :-: Ferroptosis	Validated
OTUB1	OTU deubiquitinase, ubiquitin aldehyde binding 1	HGNC:23077	Inactivation promotes ferroptosis by down-regulating SLC7A11 levels. Overexpression is critical for tumor growth.	CRISPR/Cas9, RNAi, cell death, western blot, qRT-PCR	Human, mice	HRAS mutant BJeLR-engineered tumor cells, HT-1080 cells, xenograft mouse model (athymic nude mice injected with four million HT-1080 cells)	GPX4 :-: Lipid ROS, Lipid ROS :+: Ferroptosis	Validated
CD44	CD44 molecule (Indian blood group)	HGNC:1681	Knockdown sensitizes cells to ferroptosis.	Western blot, siRNA, cell death	Human	HT-1080 cells	SLC7A11 :+: Cystine, Cystine :-: Ferroptosis	Validated
LINC00336	Long intergenic non-protein coding RNA 336	HGNC:33813	Overexpression inhibits ferroptosis. Knockdown promotes ferroptosis.	qRT-PCR, MTT assay, colony-formation assay, lipid ROS assays, iron assay, immunoblotting	Human	HT-1080 cells	SLC7A11 :+: Cystine, Cystine :-: Ferroptosis	Validated
BRD4	Bromodomain containing 4	HGNC:13575	Inhibition induces ferroptosis.	Cell proliferation assay, migration and invasion assays, RT-PCR, western blot, immunohistochemistry, iron assay	Human	HT-1080 cells	SLC7A11 :+: Cystine, Cystine :-: Ferroptosis	Validated
PRDX6	Peroxiredoxin 6	HGNC:16753	A negative regulator of ferroptotic cell death.	Western blot, flow cytometry, SRB assay, gene transfection, shRNA, LOOH quantification	Human	HT-1080 cells	SLC7A11 :+: Cystine, Cystine :-: Ferroptosis	Validated
MIR17	microRNA 17	HGNC:31547	Protects endothelial HUVEC cells from erastin-induced ferroptosis. Overexpression significantly reduced erastin-induced growth inhibition and ROS generation of HUVEC cells.	Lentivirus transduction, CCK-8 assay, DYE670 staining assay, ROS staining assay, RT-qPCR, western blot	Human	HT-1080 cells	SLC7A11 :+: Cystine, Cystine :-: Ferroptosis	Validated
SESN2	Sestrin 2	HGNC:20746	Has cytoprotective effect against ferroptosis. In cells expressing Sesn2, erastin-induced cell death, ROS formation, and glutathione depletion were almost completely inhibited compared to that in control cells.	MTT assay, RT-PCR, luciferase assay, immunoblot, siRNA, Lipid peroxidation assay, GSH measurement	Human, mice	HRAS mutant BJeLR-engineered tumor cells, HT-1080 cells, xenograft mouse model (athymic nude mice injected with four million HT-1080 cells)	GPX4 :-: Lipid ROS, Lipid ROS :+: Ferroptosis	Validated
NF2	Neurofibromin 2	HGNC:7773	Genetic inactivation of NF2 rendered cancer cells more sensitive to ferroptosis. Mediates cell density-dependent inhibition of ferroptosis.	Cell death, cell viability, lipid peroxidation, immunoblotting, CRISPR/Cas9, ChIP assay, qRT-PCR	Human, mice	HRAS mutant BJeLR-engineered tumor cells, HT-1080 cells, xenograft mouse model (athymic nude mice injected with four million HT-1080 cells)	GPX4 :-: Lipid ROS, Lipid ROS :+: Ferroptosis	Validated
ARNTL	Aryl hydrocarbon receptor nuclear translocator like	HGNC:701	Degration of the protein is critical for ferroptosis. Blocking ARNTL degradation diminished ferroptotic tumor cell death.	Cytotoxicity assays, western blot, immunoprecipitation, RNA interference, gene transfection, qPCR, MDA assay	Human, mice	HRAS mutant BJeLR-engineered tumor cells, HT-1080 cells, xenograft mouse model (athymic nude mice injected with four million HT-1080 cells)	GPX4 :-: Lipid ROS, Lipid ROS :+: Ferroptosis	Validated
CA9	Carbonic anhydrase 9	HGNC:1383	Inhibition induces ferroptosis.	Cell proliferation assay, migration and invasion assays, RT-PCR, western blot, immunohistochemistry, iron assay	Human	HT-1080 cells	SLC7A11 :+: Cystine, Cystine :-: Ferroptosis	Validated
TMBIM4	Transmembrane BAX inhibitor motif containing 4	HGNC:24257	Protects against ferroptosis in HCC cells. Inhibition increased ferroptotic cel death.	Cell viability and clonogenic survival assay, immunofluorescence, western blot, RNAi, gene transfection, qRT-PCR, lipid peroxidation assay	Human, mice	HRAS mutant BJeLR-engineered tumor cells, HT-1080 cells, xenograft mouse model (athymic nude mice injected with four million HT-1080 cells)	GPX4 :-: Lipid ROS, Lipid ROS :+: Ferroptosis	Validated
MIR212	microRNA 212	HGNC:31589	Overexpression of miR-212-5p attenuated ferroptosis while downregulation of miR-212-5p promoted ferroptotic cell death.	Controlled cortical impact model, iron assay, MDA assay, RT-PCR, western blotting, cell death	Mice	T cells	GPX4 :-: Ferroptosis	Validated
AIFM2	Apoptosis inducing factor mitochondria associated 2	HGNC:21411	A glutathione-independent ferroptosis suppressor. Pharmacological targeting of FSP1 strongly synergizes with GPX4 inhibitors to trigger ferroptosis.	Expression cloning, cell death, cell viability, LDH assay, western blot, LC-MS, NADH consumption assay	Human, mice	HRAS mutant BJeLR-engineered tumor cells, HT-1080 cells, xenograft mouse model (athymic nude mice injected with four million HT-1080 cells)	GPX4 :-: Lipid ROS, Lipid ROS :+: Ferroptosis	Validated
LAMP2	Lysosomal associated membrane protein 2	HGNC:6501	Knockdown promoted ferroptosis.	Cell viability, western blot, ROS induction, glutathione assay, lipid peroxidation assay	Human	HT-1080 cells	SLC7A11 :+: Cystine, Cystine :-: Ferroptosis	Validated
ZFP36	ZFP36 ring finger protein	HGNC:12862	ZFP36 plasmid impaired FBXW7 plasmid-induced HSC ferroptosis. Overexpression of Zfp36 impaired erastin- or sorafenib-induced ferroptosis.	Cell viability, lipid peroxidation, iron, GSH and ROS assays, western blot, RT-PCR, RNA-seq	Human, mice	HRAS mutant BJeLR-engineered tumor cells, HT-1080 cells, xenograft mouse model (athymic nude mice injected with four million HT-1080 cells)	GPX4 :-: Lipid ROS, Lipid ROS :+: Ferroptosis	Validated
PROM2	Prominin 2	HGNC:20685	Induced by ferroptotic stress and promotes resistance to ferroptotic cell death. Facilitates ferroptosis resistance in mammary epithelial and breast carcinoma cells.	RNA-seq, western blot, qPCR, siRNA, cell count, cell death, iron assay	Human	HT-1080 cells	SLC7A11 :+: Cystine, Cystine :-: Ferroptosis	Validated
CHMP5	Charged multivesicular body protein 5	HGNC:26942	Ferroptosis activators increase ESCRT-III subunits (e.g., CHMP5 and CHMP6). Knockdown of CHMP5 or CHMP6 sensitizes human cancer cells to ferroptosis.	RNAi, western blot, iron, malondialdehyde and cytotoxicity assays	Human, mice	HRAS mutant BJeLR-engineered tumor cells, HT-1080 cells, xenograft mouse model (athymic nude mice injected with four million HT-1080 cells)	GPX4 :-: Lipid ROS, Lipid ROS :+: Ferroptosis	Validated
CHMP6	Charged multivesicular body protein 6	HGNC:25675	Ferroptosis activators increase ESCRT-III subunits (e.g., CHMP5 and CHMP6). Knockdown of CHMP5 or CHMP6 sensitizes human cancer cells to ferroptosis.	RNAi, western blot, iron, malondialdehyde and cytotoxicity assays	Human, mice	HRAS mutant BJeLR-engineered tumor cells, HT-1080 cells, xenograft mouse model (athymic nude mice injected with four million HT-1080 cells)	GPX4 :-: Lipid ROS, Lipid ROS :+: Ferroptosis	Validated
CAV1	Caveolin 1	HGNC:1527	Cav-1 deficiency aggravated ferroptosis. Short hairpin RNA of Cav-1 promoted ferroptosis, which was ameliorated by Cav-1 overexpression.	Immunofluorescence, western blot, ROS detection	Human, mice	HRAS mutant BJeLR-engineered tumor cells, HT-1080 cells, xenograft mouse model (athymic nude mice injected with four million HT-1080 cells)	GPX4 :-: Lipid ROS, Lipid ROS :+: Ferroptosis	Validated
GCH1	GTP cyclohydrolase 1	HGNC:4193	Gch1 overexpression and its downstream metabolites BH4/BH2 rescue from ferroptosis. Inhibition of GCH1 activity can sensitize resistant cancer cells to ferroptosis induction.	CRISPR activation screening, qRT-PCR, cell viability, cell counts, western blot	Human	HT-1080 cells	SLC7A11 :+: Cystine, Cystine :-: Ferroptosis	Validated
PTGS2	Prostaglandin-endoperoxide synthase 2	HGNC:9605	Simply a downstream marker of ferroptosis. The most upregulated gene in BJeLR cells upon treatment with either erastin or (1S, 3R)-RSL3, but ferroptotic cell death was not affected by inhibition of the enzyme.	RT-qPCR, cell viability	Human	BJeLR cells	NA	Validated
